# Supplementary material
Source: ML conference proceedings conference paper supplement (https://openaccess.thecvf.com/content/CVPR_2019/html/Gao_NDDR-CNN_Layerwise_Feature_CVPR_2019_paper.html)
Supplement: Supplementary file 1 [file Gao_NDDR-CNN_Layerwise_Feature_CVPR_2019_supplemental.pdf]

# Supplementary Materials for the Paper: NDDR-CNN: Layerwise Feature Fusing in Multi-Task CNN by Neural Discriminative Dimensionality Reduction

Yuan Gao<sup>1</sup>, Jiayi Ma<sup>2</sup> Mingbo Zhao<sup>3</sup> Wei Liu<sup>1</sup> Alan L. Yuille<sup>4</sup>

<sup>1</sup> Tencent AI Lab <sup>2</sup> Wuhan University <sup>3</sup> City University of Hong Kong <sup>4</sup> Johns Hopkins University

{ethan.y.gao, jyma2010, mbzhao4}@gmail.com, wl2223@columbia.edu, alan.yuille@jhu.edu

We conduct additional experiments in this supplementary material file, including:

- Semantic Segmentation and Surface Normal Prediction using AlexNet [1] backbone.
- Additional ablation analysis for the cross-stitch network on VGG-16 backbone [4] to verify the hyperparameters for the cross-stitch network used in our main text are optimal.

## 1. Semantic Segmentation and Surface Normal Prediction on AlexNet

We conduct *Semantic Segmentation* and *Surface Normal Prediction* on AlexNet [1] with FCN32s [2], as those in the cross-stitch network paper [3]. We also use the same hyperparameters as the those in [3]. The results in Table S1 show that our method outperforms the cross-stitch network and the sluice network on AlexNet.

|                | Surface Normal Prediction |             |                      |             |             | Semantic Seg. |             |
|----------------|---------------------------|-------------|----------------------|-------------|-------------|---------------|-------------|
|                | Angle Dist.               |             | Within $t^\circ$ (%) |             |             | (%)           |             |
| <b>AlexNet</b> | Mean                      | Med.        | 11.25                | 22.5        | 30          | mIoU          | PAcc        |
| C.-S.          | 19.7                      | 17.1        | 28.1                 | 65.9        | <b>80.0</b> | 21.7          | 53.4        |
| Sluice         | 19.5                      | 16.6        | 29.7                 | 66.2        | 79.5        | 21.9          | 53.8        |
| Ours           | <b>19.4</b>               | <b>15.5</b> | <b>36.6</b>          | <b>66.8</b> | 79.2        | <b>23.1</b>   | <b>56.3</b> |

Table S1. The results for *Semantic Segmentation* and *Surface Normal Prediction* on AlexNet.

## 2. Ablation Analysis for the Cross-Stitch Network on VGG-16

In this section, we verify that, in our main text, we have fair comparisons with the state-of-the-art cross-stitch network, especially regarding the hyperparameters on different network backbones. In other words, we show that the hyperparameters for the cross-stitch network, originally obtained from [3] on AlexNet, are still the best for other network backbones. This can be investigated by doing ablation

analysis of the cross-stitch network on other network backbones. The ablation analysis of the cross-stitch network on VGG-16 [4] is shown in Table S2, which demonstrates that the best hyperparameters of the cross-stitch network have been used in our main text for fair comparative-evaluation.

|                   | Surface Normal Prediction |             |                      |             |             | Semantic Seg. |             |
|-------------------|---------------------------|-------------|----------------------|-------------|-------------|---------------|-------------|
|                   | Angle Dist.               |             | Within $t^\circ$ (%) |             |             | (%)           |             |
| $(\alpha, \beta)$ | Mean                      | Med.        | 11.25                | 22.5        | 30          | mIoU          | PAcc        |
| (0.9, 0.1)        | <b>15.2</b>               | 11.7        | 48.6                 | <b>76.0</b> | <b>86.5</b> | <b>34.8</b>   | <b>65.0</b> |
| (0.7, 0.3)        | 15.5                      | <b>11.6</b> | <b>48.7</b>          | 75.1        | 85.5        | 34.4          | 64.6        |
| (0.5, 0.5)        | 15.9                      | 12.0        | 47.5                 | 73.7        | 84.4        | 33.9          | 64.0        |
| Scale             | Mean                      | Med.        | 11.25                | 22.5        | 30          | mIoU          | PAcc        |
| 1                 | 15.3                      | 11.9        | 47.9                 | 75.8        | 86.3        | 34.5          | 64.6        |
| 10                | 15.5                      | 12.0        | 47.3                 | 75.1        | 86.0        | 35.0          | 65.0        |
| 10 <sup>2</sup>   | 15.3                      | 11.8        | 48.1                 | 75.6        | 86.2        | <b>35.1</b>   | <b>65.2</b> |
| 10 <sup>3</sup>   | <b>15.2</b>               | <b>11.7</b> | <b>48.6</b>          | <b>76.0</b> | <b>86.5</b> | 34.9          | 65.0        |

Table S2. Ablation analysis for the cross-stitch network on VGG-16. This is to ensure that the hyperparameters for the cross-stitch network, *i.e.*,  $(\alpha, \beta) = (0.9, 0.1)$  and 1000x learning rate for fuse layers, used in our main text are the best ones for the cross-stitch network.

## References

- [1] Alex Krizhevsky, Ilya Sutskever, and Geoffrey E Hinton. Imagenet classification with deep convolutional neural networks. In *NIPS*, 2012. 1
- [2] Jonathan Long, Evan Shelhamer, and Trevor Darrell. Fully convolutional networks for semantic segmentation. In *CVPR*, pages 3431–3440, 2015. 1
- [3] Ishan Misra, Abhinav Shrivastava, Abhinav Gupta, and Martial Hebert. Cross-stitch networks for multi-task learning. In *CVPR*, 2016. 1
- [4] Karen Simonyan and Andrew Zisserman. Very deep convolutional networks for large-scale image recognition. In *ICLR*, 2015. 1
